# Supplementary material
Source: publisher figshare collection journal article supplement (https://rs.figshare.com/ndownloader/files/13643405)
Supplement: Supplementary file 1 [file 13643405]

	Genotype	Score	Treatment	Sex	Censor
1	control-traIR	4	Individual	Female	1
2	control-traIR	4	Individual	Female	1
3	control-traIR	4	Individual	Female	1
4	control-traIR	7	Group	Female	1
5	control-traIR	13	Individual	Female	1
6	control-traIR	42	Individual	Female	1
7	control-traIR	48	Individual	Female	0
8	control-traIR	51	Group	Female	1
9	control-traIR	52	Group	Female	1
10	control-traIR	52	Individual	Female	1
11	control-traIR	60	Individual	Female	1
12	control-traIR	61	Group	Female	1
13	control-traIR	64	Individual	Female	1
14	control-traIR	64	Individual	Female	1
15	control-traIR	66	Individual	Female	1
16	control-traIR	66	Individual	Female	1
17	control-traIR	68	Group	Female	1
18	control-traIR	68	Group	Female	1
19	control-traIR	69	Group	Female	1
20	control-traIR	69	Group	Female	1
21	control-traIR	69	Group	Female	1
22	control-traIR	70	Group	Female	1
23	control-traIR	70	Individual	Female	1
24	control-traIR	72	Group	Female	1
25	control-traIR	72	Group	Female	1
26	control-traIR	72	Individual	Female	1
27	control-traIR	72	Individual	Female	1
28	control-traIR	72	Individual	Female	1
29	control-traIR	73	Group	Female	1
30	control-traIR	73	Group	Female	1
31	control-traIR	73	Group	Female	1
32	control-traIR	73	Group	Female	1
33	control-traIR	73	Individual	Female	1
34	control-traIR	73	Individual	Female	1
35	control-traIR	74	Group	Female	1
36	control-traIR	74	Individual	Female	1
37	control-traIR	76	Group	Female	1
38	control-traIR	77	Group	Female	1
39	control-traIR	77	Group	Female	1
40	control-traIR	77	Group	Female	1
41	control-traIR	77	Group	Female	1
42	control-traIR	77	Group	Female	1
43	control-traIR	77	Group	Female	1
44	control-traIR	79	Individual	Female	1
45	control-traIR	79	Individual	Female	1
46	control-traIR	80	Group	Female	1
47	control-traIR	80	Group	Female	1
48	control-traIR	80	Group	Female	1
49	control-traIR	80	Group	Female	1
50	control-traIR	80	Group	Female	1
51	control-traIR	80	Group	Female	1
52	control-traIR	80	Group	Female	1
53	control-traIR	80	Group	Female	1
54	control-traIR	80	Group	Female	1
55	control-traIR	80	Group	Female	1
56	control-traIR	80	Group	Female	1
57	control-traIR	81	Group	Female	1
58	control-traIR	81	Group	Female	1
59	control-traIR	81	Group	Female	1
60	control-traIR	81	Group	Female	1
61	control-traIR	81	Group	Female	1
62	control-traIR	81	Group	Female	1
63	control-traIR	81	Group	Female	1
64	control-traIR	83	Group	Female	1
65	control-traIR	83	Group	Female	1
66	control-traIR	83	Group	Female	1
67	control-traIR	83	Group	Female	1
68	control-traIR	83	Group	Female	1
69	control-traIR	83	Group	Female	1
70	control-traIR	83	Group	Female	1
71	control-traIR	83	Individual	Female	1
72	control-traIR	84	Group	Female	1
73	control-traIR	84	Group	Female	1
74	control-traIR	84	Group	Female	1
75	control-traIR	84	Group	Female	1
76	control-traIR	84	Group	Female	1
77	control-traIR	84	Group	Female	1
78	control-traIR	84	Group	Female	1
79	control-traIR	84	Group	Female	1
80	control-traIR	84	Group	Female	1
81	control-traIR	84	Group	Female	1
82	control-traIR	84	Group	Female	1
83	control-traIR	84	Individual	Female	1
84	control-traIR	84	Individual	Female	1
85	control-traIR	85	Group	Female	1
86	control-traIR	85	Group	Female	1
87	control-traIR	86	Group	Female	1
88	control-traIR	86	Group	Female	1
89	control-traIR	86	Group	Female	1
90	control-traIR	86	Group	Female	1
91	control-traIR	86	Individual	Female	1
92	control-traIR	86	Individual	Female	1
93	control-traIR	87	Group	Female	1
94	control-traIR	87	Group	Female	1
95	control-traIR	88	Individual	Female	1
96	control-traIR	88	Individual	Female	1
97	control-traIR	88	Individual	Female	1
98	control-traIR	88	Individual	Female	1
99	control-traIR	89	Individual	Female	1
100	control-traIR	91	Individual	Female	1
101	control-traIR	91	Individual	Female	1
102	control-traIR	91	Individual	Female	1
103	control-traIR	92	Group	Female	1
104	control-traIR	93	Group	Female	1
105	control-traIR	97	Individual	Female	1
106	control-elavF	4	Individual	Female	1
107	control-elavF	18	Individual	Female	1
108	control-elavF	18	Individual	Female	0
109	control-elavF	28	Group	Female	1
110	control-elavF	28	Individual	Female	1
111	control-elavF	31	Individual	Female	1
112	control-elavF	31	Individual	Female	1
113	control-elavF	32	Individual	Female	1
114	control-elavF	38	Group	Female	1
115	control-elavF	39	Group	Female	1
116	control-elavF	44	Individual	Female	1
117	control-elavF	47	Group	Female	1
118	control-elavF	48	Group	Female	1
119	control-elavF	51	Group	Female	1
120	control-elavF	51	Group	Female	1
121	control-elavF	52	Individual	Female	1
122	control-elavF	52	Individual	Female	1
123	control-elavF	54	Individual	Female	1
124	control-elavF	55	Group	Female	1
125	control-elavF	58	Group	Female	1
126	control-elavF	59	Group	Female	1
127	control-elavF	59	Group	Female	1
128	control-elavF	59	Group	Female	1
129	control-elavF	59	Group	Female	1
130	control-elavF	59	Group	Female	1
131	control-elavF	59	Group	Female	1
132	control-elavF	59	Group	Female	1
133	control-elavF	60	Group	Female	1
134	control-elavF	60	Group	Female	1
135	control-elavF	60	Group	Female	1
136	control-elavF	64	Group	Female	1
137	control-elavF	64	Group	Female	1
138	control-elavF	64	Group	Female	1
139	control-elavF	64	Group	Female	1
140	control-elavF	64	Group	Female	1
141	control-elavF	64	Group	Female	1
142	control-elavF	64	Group	Female	1
143	control-elavF	64	Individual	Female	1
144	control-elavF	64	Individual	Female	1
145	control-elavF	66	Group	Female	1
146	control-elavF	66	Group	Female	1
147	control-elavF	66	Group	Female	1
148	control-elavF	66	Individual	Female	1
149	control-elavF	66	Individual	Female	1
150	control-elavF	68	Group	Female	1
151	control-elavF	68	Group	Female	1
152	control-elavF	68	Group	Female	1
153	control-elavF	68	Group	Female	1
154	control-elavF	68	Individual	Female	1
155	control-elavF	69	Group	Female	1
156	control-elavF	70	Group	Female	1
157	control-elavF	70	Group	Female	1
158	control-elavF	70	Group	Female	1
159	control-elavF	70	Individual	Female	1
160	control-elavF	70	Individual	Female	1
161	control-elavF	70	Individual	Female	1
162	control-elavF	70	Individual	Female	1
163	control-elavF	72	Group	Female	1
164	control-elavF	72	Group	Female	1
165	control-elavF	72	Group	Female	1
166	control-elavF	72	Individual	Female	1
167	control-elavF	73	Individual	Female	1
168	control-elavF	74	Group	Female	1
169	control-elavF	74	Group	Female	1
170	control-elavF	74	Group	Female	1
171	control-elavF	74	Group	Female	1
172	control-elavF	74	Group	Female	1
173	control-elavF	74	Group	Female	1
174	control-elavF	74	Individual	Female	1
175	control-elavF	76	Group	Female	1
176	control-elavF	76	Group	Female	1
177	control-elavF	76	Group	Female	1
178	control-elavF	76	Group	Female	1
179	control-elavF	76	Group	Female	1
180	control-elavF	76	Group	Female	1
181	control-elavF	76	Individual	Female	1
182	control-elavF	76	Individual	Female	1
183	control-elavF	76	Individual	Female	1
184	control-elavF	76	Individual	Female	1
185	control-elavF	77	Group	Female	1
186	control-elavF	77	Group	Female	1
187	control-elavF	77	Group	Female	1
188	control-elavF	77	Group	Female	1
189	control-elavF	77	Group	Female	1
190	control-elavF	77	Group	Female	1
191	control-elavF	77	Group	Female	1
192	control-elavF	77	Individual	Female	1
193	control-elavF	79	Group	Female	1
194	control-elavF	79	Group	Female	1
195	control-elavF	79	Group	Female	1
196	control-elavF	79	Group	Female	1
197	control-elavF	79	Individual	Female	1
198	control-elavF	81	Group	Female	1
199	control-elavF	81	Group	Female	1
200	control-elavF	81	Group	Female	1
201	control-elavF	81	Individual	Female	1
202	control-elavF	81	Individual	Female	1
203	control-elavF	83	Individual	Female	1
204	control-elavF	83	Individual	Female	1
205	control-elavF	84	Group	Female	1
206	control-elavF	84	Group	Female	1
207	control-elavF	84	Individual	Female	1
208	control-elavF	85	Group	Female	1
209	control-elavF	85	Group	Female	1
210	control-elavF	88	Individual	Female	1
211	Masculinised	4	Group	Female	0
212	Masculinised	4	Group	Female	1
213	Masculinised	4	Group	Female	1
214	Masculinised	4	Group	Female	1
215	Masculinised	6	Individual	Female	1
216	Masculinised	7	Group	Female	1
217	Masculinised	7	Group	Female	1
218	Masculinised	14	Group	Female	1
219	Masculinised	25	Individual	Female	1
220	Masculinised	25	Individual	Female	1
221	Masculinised	26	Group	Female	1
222	Masculinised	28	Group	Female	1
223	Masculinised	28	Group	Female	1
224	Masculinised	31	Individual	Female	1
225	Masculinised	31	Individual	Female	1
226	Masculinised	33	Group	Female	1
227	Masculinised	33	Group	Female	1
228	Masculinised	34	Individual	Female	1
229	Masculinised	34	Individual	Female	1
230	Masculinised	35	Group	Female	1
231	Masculinised	35	Group	Female	1
232	Masculinised	38	Group	Female	1
233	Masculinised	38	Group	Female	1
234	Masculinised	38	Group	Female	1
235	Masculinised	38	Group	Female	1
236	Masculinised	38	Group	Female	1
237	Masculinised	39	Individual	Female	1
238	Masculinised	42	Group	Female	1
239	Masculinised	42	Group	Female	1
240	Masculinised	42	Group	Female	1
241	Masculinised	44	Group	Female	1
242	Masculinised	44	Group	Female	1
243	Masculinised	45	Group	Female	1
244	Masculinised	45	Group	Female	1
245	Masculinised	45	Group	Female	1
246	Masculinised	46	Group	Female	1
247	Masculinised	46	Group	Female	1
248	Masculinised	47	Group	Female	1
249	Masculinised	47	Group	Female	1
250	Masculinised	48	Group	Female	1
251	Masculinised	48	Group	Female	1
252	Masculinised	48	Group	Female	1
253	Masculinised	48	Group	Female	1
254	Masculinised	48	Group	Female	1
255	Masculinised	48	Group	Female	1
256	Masculinised	49	Group	Female	1
257	Masculinised	49	Group	Female	1
258	Masculinised	51	Group	Female	1
259	Masculinised	51	Group	Female	1
260	Masculinised	51	Group	Female	1
261	Masculinised	51	Group	Female	1
262	Masculinised	51	Group	Female	1
263	Masculinised	51	Group	Female	1
264	Masculinised	51	Group	Female	1
265	Masculinised	51	Group	Female	1
266	Masculinised	51	Group	Female	1
267	Masculinised	51	Group	Female	1
268	Masculinised	51	Group	Female	1
269	Masculinised	51	Group	Female	1
270	Masculinised	51	Group	Female	1
271	Masculinised	51	Group	Female	1
272	Masculinised	51	Individual	Female	1
273	Masculinised	52	Group	Female	1
274	Masculinised	52	Group	Female	1
275	Masculinised	52	Group	Female	1
276	Masculinised	52	Group	Female	1
277	Masculinised	52	Group	Female	1
278	Masculinised	52	Group	Female	1
279	Masculinised	52	Individual	Female	1
280	Masculinised	52	Individual	Female	1
281	Masculinised	53	Group	Female	1
282	Masculinised	53	Group	Female	1
283	Masculinised	53	Group	Female	1
284	Masculinised	53	Group	Female	1
285	Masculinised	53	Group	Female	1
286	Masculinised	53	Group	Female	1
287	Masculinised	53	Group	Female	1
288	Masculinised	53	Group	Female	1
289	Masculinised	53	Group	Female	1
290	Masculinised	53	Individual	Female	1
291	Masculinised	53	Individual	Female	1
292	Masculinised	54	Group	Female	1
293	Masculinised	54	Group	Female	1
294	Masculinised	54	Group	Female	1
295	Masculinised	54	Individual	Female	0
296	Masculinised	54	Individual	Female	1
297	Masculinised	54	Individual	Female	1
298	Masculinised	55	Group	Female	1
299	Masculinised	56	Group	Female	1
300	Masculinised	56	Group	Female	1
301	Masculinised	56	Group	Female	1
302	Masculinised	56	Group	Female	1
303	Masculinised	56	Group	Female	1
304	Masculinised	56	Group	Female	1
305	Masculinised	56	Group	Female	1
306	Masculinised	56	Group	Female	1
307	Masculinised	56	Group	Female	1
308	Masculinised	57	Group	Female	1
309	Masculinised	57	Group	Female	1
310	Masculinised	57	Group	Female	1
311	Masculinised	57	Group	Female	1
312	Masculinised	57	Group	Female	1
313	Masculinised	58	Group	Female	1
314	Masculinised	58	Group	Female	1
315	Masculinised	58	Group	Female	1
316	Masculinised	58	Individual	Female	1
317	Masculinised	59	Group	Female	1
318	Masculinised	59	Group	Female	1
319	Masculinised	59	Group	Female	1
320	Masculinised	59	Individual	Female	1
321	Masculinised	60	Group	Female	1
322	Masculinised	60	Group	Female	1
323	Masculinised	60	Group	Female	1
324	Masculinised	60	Individual	Female	1
325	Masculinised	61	Group	Female	1
326	Masculinised	61	Group	Female	1
327	Masculinised	61	Individual	Female	1
328	Masculinised	61	Individual	Female	1
329	Masculinised	62	Individual	Female	1
330	Masculinised	62	Individual	Female	1
331	Masculinised	62	Individual	Female	1
332	Masculinised	64	Group	Female	1
333	Masculinised	64	Group	Female	1
334	Masculinised	64	Individual	Female	1
335	Masculinised	66	Individual	Female	1
336	Masculinised	66	Individual	Female	1
337	Masculinised	66	Individual	Female	1
338	Masculinised	66	Individual	Female	1
339	Masculinised	69	Group	Female	1
340	Masculinised	69	Group	Female	1
341	Masculinised	70	Individual	Female	1
342	Masculinised	70	Individual	Female	1
343	Masculinised	70	Individual	Female	1
344	Masculinised	72	Individual	Female	1
345	Masculinised	72	Individual	Female	1
346	Masculinised	72	Individual	Female	1
347	Masculinised	73	Individual	Female	1
348	Masculinised	73	Individual	Female	1
349	Masculinised	81	Individual	Female	1
350	Masculinised	83	Individual	Female	1
351	Masculinised	84	Individual	Female	1
352	control-elavM	4	Group	Male	1
353	control-elavM	4	Group	Male	1
354	control-elavM	4	Individual	Male	1
355	control-traF	6	Individual	Male	1
356	control-traF	7	Group	Male	1
357	control-elavM	7	Group	Male	1
358	control-elavM	7	Group	Male	1
359	control-traF	9	Group	Male	1
360	control-traF	10	Group	Male	1
361	control-traF	10	Group	Male	1
362	control-elavM	10	Group	Male	1
363	control-elavM	12	Group	Male	1
364	control-elavM	12	Group	Male	1
365	control-elavM	14	Group	Male	1
366	control-traF	17	Group	Male	1
367	control-elavM	17	Group	Male	1
368	control-elavM	20	Individual	Male	1
369	control-traF	21	Group	Male	1
370	control-elavM	21	Group	Male	1
371	control-traF	24	Group	Male	1
372	control-traF	24	Group	Male	1
373	control-traF	24	Group	Male	1
374	control-traF	24	Group	Male	1
375	control-elavM	24	Group	Male	1
376	control-elavM	24	Group	Male	1
377	control-elavM	24	Group	Male	1
378	control-elavM	26	Group	Male	1
379	control-elavM	27	Individual	Male	1
380	control-elavM	27	Individual	Male	1
381	control-elavM	27	Individual	Male	1
382	control-elavM	28	Group	Male	1
383	control-elavM	28	Group	Male	1
384	control-traF	31	Group	Male	1
385	control-traF	31	Group	Male	1
386	control-traF	31	Group	Male	1
387	control-traF	31	Group	Male	1
388	control-elavM	31	Group	Male	1
389	control-elavM	33	Group	Male	1
390	control-elavM	33	Group	Male	1
391	control-traF	38	Group	Male	1
392	control-traF	38	Group	Male	1
393	control-traF	38	Group	Male	1
394	control-traF	38	Group	Male	1
395	control-elavM	38	Group	Male	1
396	control-elavM	38	Individual	Male	1
397	control-traF	40	Group	Male	1
398	control-traF	40	Individual	Male	1
399	control-elavM	41	Individual	Male	1
400	control-traF	42	Group	Male	1
401	control-traF	42	Group	Male	1
402	control-traF	42	Group	Male	1
403	control-traF	42	Group	Male	1
404	control-traF	42	Group	Male	1
405	control-elavM	42	Group	Male	1
406	control-traF	44	Group	Male	1
407	control-traF	44	Group	Male	1
408	control-traF	44	Group	Male	1
409	control-traF	44	Group	Male	1
410	control-elavM	44	Group	Male	1
411	control-elavM	44	Group	Male	1
412	control-elavM	44	Group	Male	1
413	control-elavM	44	Individual	Male	1
414	control-traF	45	Group	Male	1
415	control-traF	45	Group	Male	1
416	control-traF	45	Group	Male	1
417	control-elavM	45	Group	Male	1
418	control-traF	46	Group	Male	1
419	control-elavM	46	Group	Male	1
420	control-traF	47	Group	Male	1
421	control-traF	47	Group	Male	1
422	control-traF	47	Group	Male	1
423	control-traF	47	Group	Male	1
424	control-traF	47	Group	Male	1
425	control-elavM	47	Group	Male	1
426	control-traF	48	Group	Male	1
427	control-traF	48	Group	Male	1
428	control-traF	48	Group	Male	1
429	control-elavM	48	Group	Male	1
430	control-elavM	48	Group	Male	1
431	control-elavM	48	Group	Male	1
432	control-elavM	48	Individual	Male	1
433	control-elavM	48	Individual	Male	1
434	control-traF	49	Group	Male	1
435	control-traF	49	Individual	Male	1
436	control-traF	51	Group	Male	1
437	control-traF	51	Group	Male	1
438	control-traF	51	Group	Male	1
439	control-traF	51	Group	Male	1
440	control-traF	51	Group	Male	1
441	control-traF	51	Group	Male	1
442	control-traF	51	Group	Male	1
443	control-traF	51	Group	Male	1
444	control-traF	51	Group	Male	1
445	control-elavM	51	Group	Male	1
446	control-elavM	51	Group	Male	1
447	control-elavM	51	Individual	Male	1
448	control-elavM	51	Individual	Male	1
449	control-traF	52	Group	Male	1
450	control-traF	52	Group	Male	1
451	control-traF	52	Group	Male	1
452	control-traF	52	Group	Male	1
453	control-traF	52	Group	Male	1
454	control-traF	52	Group	Male	1
455	control-traF	52	Group	Male	1
456	control-traF	52	Group	Male	1
457	control-elavM	52	Group	Male	1
458	control-elavM	52	Group	Male	1
459	control-elavM	52	Group	Male	1
460	control-elavM	52	Group	Male	1
461	control-elavM	52	Group	Male	1
462	control-elavM	52	Group	Male	1
463	control-elavM	52	Group	Male	1
464	control-elavM	52	Group	Male	1
465	control-traF	52	Individual	Male	1
466	control-traF	52	Individual	Male	1
467	control-traF	52	Individual	Male	1
468	control-traF	53	Group	Male	1
469	control-traF	53	Group	Male	1
470	control-traF	53	Group	Male	1
471	control-traF	53	Group	Male	1
472	control-traF	53	Group	Male	1
473	control-traF	53	Group	Male	1
474	control-elavM	53	Group	Male	1
475	control-elavM	53	Group	Male	1
476	control-elavM	53	Group	Male	1
477	control-elavM	53	Group	Male	1
478	control-elavM	53	Group	Male	1
479	control-elavM	53	Group	Male	1
480	control-elavM	53	Group	Male	1
481	control-elavM	53	Group	Male	1
482	control-elavM	53	Group	Male	1
483	control-elavM	53	Individual	Male	1
484	control-elavM	53	Individual	Male	1
485	control-traF	54	Group	Male	1
486	control-elavM	54	Group	Male	1
487	control-traF	54	Individual	Male	1
488	control-traF	54	Individual	Male	1
489	control-traF	54	Individual	Male	1
490	control-traF	54	Individual	Male	1
491	control-traF	54	Individual	Male	1
492	control-elavM	54	Individual	Male	1
493	control-elavM	54	Individual	Male	1
494	control-elavM	55	Group	Male	1
495	control-elavM	55	Group	Male	1
496	control-elavM	55	Group	Male	1
497	control-elavM	56	Group	Male	1
498	control-elavM	56	Group	Male	1
499	control-elavM	56	Group	Male	1
500	control-elavM	56	Group	Male	1
501	control-elavM	56	Group	Male	1
502	control-elavM	56	Group	Male	1
503	control-elavM	56	Group	Male	1
504	control-elavM	56	Group	Male	1
505	control-elavM	56	Group	Male	1
506	control-traF	57	Group	Male	1
507	control-traF	57	Group	Male	1
508	control-traF	57	Group	Male	1
509	control-elavM	57	Group	Male	1
510	control-elavM	58	Group	Male	1
511	control-elavM	58	Group	Male	1
512	control-traF	58	Individual	Male	1
513	control-elavM	58	Individual	Male	1
514	control-traF	59	Group	Male	1
515	control-traF	59	Group	Male	1
516	control-elavM	59	Group	Male	1
517	control-elavM	59	Group	Male	1
518	control-elavM	59	Group	Male	1
519	control-elavM	59	Group	Male	1
520	control-elavM	59	Group	Male	1
521	control-traF	59	Individual	Male	1
522	control-traF	59	Individual	Male	1
523	control-elavM	59	Individual	Male	1
524	control-traF	60	Individual	Male	1
525	control-traF	60	Individual	Male	1
526	control-traF	61	Individual	Male	1
527	control-elavM	61	Individual	Male	1
528	control-traF	62	Individual	Male	1
529	control-elavM	62	Individual	Male	1
530	control-elavM	62	Individual	Male	1
531	control-traF	64	Individual	Male	1
532	control-traF	64	Individual	Male	1
533	control-traF	64	Individual	Male	1
534	control-traF	64	Individual	Male	1
535	control-traF	64	Individual	Male	1
536	control-elavM	64	Individual	Male	1
537	control-traF	66	Individual	Male	1
538	control-traF	66	Individual	Male	1
539	control-elavM	66	Individual	Male	1
540	control-elavM	66	Individual	Male	1
541	control-traF	68	Individual	Male	1
542	control-traF	69	Individual	Male	1
543	control-elavM	70	Individual	Male	1
544	control-traF	72	Individual	Male	1
545	control-elavM	72	Individual	Male	1
546	control-elavM	72	Individual	Male	1
547	control-elavM	72	Individual	Male	1
548	control-traF	73	Individual	Male	1
549	control-elavM	73	Individual	Male	1
550	control-elavM	74	Individual	Male	1
551	control-traF	76	Individual	Male	1
552	control-traF	76	Individual	Male	1
553	control-traF	77	Individual	Male	1
554	control-traF	77	Individual	Male	1
555	control-elavM	77	Individual	Male	1
556	control-elavM	79	Individual	Male	1
557	control-elavM	79	Individual	Male	1
558	control-elavM	85	Individual	Male	1
559	control-traF	87	Individual	Male	1
560	control-elavM	88	Individual	Male	1
561	Feminised	4	Group	Male	1
562	Feminised	4	Group	Male	1
563	Feminised	6	Group	Male	1
564	Feminised	6	Group	Male	1
565	Feminised	6	Group	Male	1
566	Feminised	7	Group	Male	1
567	Feminised	12	Group	Male	1
568	Feminised	12	Group	Male	1
569	Feminised	17	Group	Male	1
570	Feminised	19	Group	Male	1
571	Feminised	21	Group	Male	1
572	Feminised	21	Group	Male	1
573	Feminised	21	Group	Male	1
574	Feminised	21	Group	Male	1
575	Feminised	24	Group	Male	1
576	Feminised	24	Group	Male	1
577	Feminised	24	Group	Male	1
578	Feminised	25	Individual	Male	1
579	Feminised	26	Group	Male	1
580	Feminised	27	Individual	Male	1
581	Feminised	31	Group	Male	1
582	Feminised	32	Individual	Male	1
583	Feminised	33	Group	Male	1
584	Feminised	33	Group	Male	1
585	Feminised	34	Individual	Male	1
586	Feminised	35	Group	Male	1
587	Feminised	35	Group	Male	1
588	Feminised	35	Individual	Male	1
589	Feminised	35	Individual	Male	1
590	Feminised	38	Group	Male	1
591	Feminised	38	Group	Male	1
592	Feminised	38	Group	Male	1
593	Feminised	38	Group	Male	1
594	Feminised	38	Group	Male	1
595	Feminised	38	Individual	Male	1
596	Feminised	38	Individual	Male	1
597	Feminised	38	Individual	Male	1
598	Feminised	39	Individual	Male	1
599	Feminised	39	Individual	Male	1
600	Feminised	40	Group	Male	1
601	Feminised	40	Group	Male	1
602	Feminised	41	Group	Male	1
603	Feminised	41	Individual	Male	1
604	Feminised	42	Group	Male	1
605	Feminised	42	Group	Male	1
606	Feminised	42	Group	Male	1
607	Feminised	44	Individual	Male	1
608	Feminised	45	Group	Male	1
609	Feminised	45	Group	Male	1
610	Feminised	45	Group	Male	1
611	Feminised	45	Individual	Male	1
612	Feminised	45	Individual	Male	1
613	Feminised	47	Group	Male	1
614	Feminised	47	Group	Male	1
615	Feminised	47	Group	Male	1
616	Feminised	47	Individual	Male	1
617	Feminised	48	Group	Male	1
618	Feminised	49	Group	Male	1
619	Feminised	49	Group	Male	1
620	Feminised	49	Individual	Male	1
621	Feminised	51	Group	Male	1
622	Feminised	51	Group	Male	1
623	Feminised	51	Individual	Male	1
624	Feminised	51	Individual	Male	1
625	Feminised	52	Group	Male	1
626	Feminised	52	Group	Male	1
627	Feminised	52	Group	Male	1
628	Feminised	52	Group	Male	1
629	Feminised	52	Group	Male	1
630	Feminised	52	Group	Male	1
631	Feminised	52	Group	Male	1
632	Feminised	52	Individual	Male	1
633	Feminised	53	Group	Male	1
634	Feminised	53	Group	Male	1
635	Feminised	53	Group	Male	1
636	Feminised	53	Individual	Male	1
637	Feminised	53	Individual	Male	1
638	Feminised	54	Group	Male	1
639	Feminised	54	Group	Male	1
640	Feminised	54	Individual	Male	1
641	Feminised	54	Individual	Male	1
642	Feminised	55	Individual	Male	1
643	Feminised	56	Group	Male	1
644	Feminised	56	Individual	Male	1
645	Feminised	56	Individual	Male	1
646	Feminised	56	Individual	Male	1
647	Feminised	58	Individual	Male	1
648	Feminised	58	Individual	Male	1
649	Feminised	59	Group	Male	1
650	Feminised	61	Individual	Male	1
651	Feminised	62	Individual	Male	1
652	Feminised	64	Group	Male	1
653	Feminised	64	Individual	Male	1
